# Supplementary material for: Lingering symptoms in non-hospitalized patients with COVID-19 – a prospective survey study of symptom expression and effects on mental health in Germany
Source: Springer Nature journal article supplement (doi:10.1186/s12875-025-02784-3), 2025-04-02
Supplement: MOESM2 [file 12875_2025_2784_MOESM2_ESM.pdf]

| Symptom severities          |        |        |        |         |         |         |         |         |                                                                            |
|-----------------------------|--------|--------|--------|---------|---------|---------|---------|---------|----------------------------------------------------------------------------|
| Symptom                     | Week 2 | Week 4 | Week 8 | Week 12 | Week 16 | Week 20 | Week 24 | Average | 0 none<br>1 very mild<br>2 mild<br>3 Moderate<br>4 Severe<br>5 Very severe |
| Reduced sense of smell      | 3,7    | 2,6    | 2,2    | 2,9     | 2,9     | 2,4     | 2,4     | 2,4     |                                                                            |
| Fatigue/tiredness           | 3,1    | 2,6    | 2,5    | 2,7     | 2,8     | 2,9     | 2,8     | 2,2     |                                                                            |
| Reduced sense of taste      | 3,8    | 2,6    | 2,1    | 2,5     | 2,3     | 2,1     | 2,1     | 2,2     |                                                                            |
| Loss of appetite            | 2,4    | 2,0    | 1,5    | 2,5     | 1,0     |         |         | 1,4     |                                                                            |
| Rhinitis                    | 2,7    | 1,9    | 1,6    | 2,5     | 2,0     | 2,0     |         | 1,6     |                                                                            |
| Reduced concentration       | 2,1    | 2,4    | 2,5    | 2,4     | 2,5     | 2,7     | 2,5     | 2,1     |                                                                            |
| Deteriorated skin condition | 2,1    | 2,3    | 2,0    | 2,3     | 3,0     | 3,0     | 3,0     | 1,8     |                                                                            |
| Muscle pain                 | 2,1    | 1,9    | 1,5    | 2,3     | 2,4     | 3,3     | 3,5     | 1,5     |                                                                            |
| Headache                    | 2,4    | 2,2    | 2,0    | 2,2     | 2,7     | 3,5     | 3,3     | 1,7     |                                                                            |
| Shortness of breath         | 2,4    | 2,4    | 2,1    | 2,1     | 2,3     | 2,4     | 2,5     | 2,0     |                                                                            |
| Deteriorated sleep quality  | 2,5    | 2,2    | 2,1    | 2,1     | 2,4     | 2,0     | 2,3     | 1,8     |                                                                            |
| Gastrointestinal symptoms   | 2,3    | 2,6    | 2,8    | 2,0     | 2,5     | 2,5     | 3,5     | 1,6     |                                                                            |
| Cough                       | 2,4    | 1,9    | 1,9    | 1,8     | 2,5     | 3,0     | 3,0     | 1,5     |                                                                            |
| Vertigo                     | 2,1    | 1,6    | 1,6    | 1,8     | 1,5     | 2,0     | 2,0     | 1,4     |                                                                            |
| Deterioration of vision     | 1,9    | 1,5    | 2,0    |         |         |         |         | 1,3     |                                                                            |
| Sore throat                 | 1,9    | 1,5    | 1,5    |         |         |         |         | 1,0     |                                                                            |
| Fever                       | 2,4    | 1,0    | 1,0    |         |         |         |         | 0,9     |                                                                            |
| Mentale symptoms            | 2,9    | 2,2    | 2,0    | 2,0     | 2,2     | 2,2     | 2,1     | 1,9     |                                                                            |
